1            Compensation or preservation? Different roles of functional  
2                            lateralization in speech perception in older  
3                                            non-musicians and musicians

4

5    Xihu Jin<sup>1</sup>, Lei Zhang<sup>1,2</sup>, Guowei Wu<sup>1,2</sup>, Xiuyi Wang<sup>1</sup>, Yi Du<sup>1,2,3,4\*</sup>

6    <sup>1</sup> CAS Key Laboratory of Behavioral Science, Institute of Psychology, Chinese Academy of  
7    Sciences, Beijing, China 100101

8    <sup>2</sup> Department of Psychology, University of Chinese Academy of Sciences, Beijing, China  
9    100049

10    <sup>3</sup> CAS Center for Excellence in Brain Science and Intelligence Technology, Shanghai, China  
11    200031

12    <sup>4</sup> Chinese Institute for Brain Research, Beijing, China 102206

13

14    \* Corresponding author:

15    Dr. Yi Du

16    16 Lincui Road, Chaoyang District, Beijing, China 100101

17    **Email:** duy@psych.ac.cn

18

19

20 **Abstract**

21 Musical training can offset age-related decline of speech perception in noisy environments.  
22 However, whether functional compensation or functional preservation the older musicians  
23 adopt to counteract the adverse effects of aging is unclear yet, so do older non-musicians. Here,  
24 we employed the fundamental brain organization feature named functional lateralization, and  
25 calculated network-based lateralization indices (LIs) of resting-state functional connectivity (FC)  
26 in 23 older musicians (OM), 23 older non-musicians (ONM), and 24 young non-musicians  
27 (YNM). OM outperformed ONM and almost equalized YNM in speech-in-noise/speech tasks.  
28 In parallel, ONM exhibited reduced lateralization than YNM in LI of intrahemispheric FC  
29 (LI\_intra) in cingulo-opercular network (CON) and interhemispheric heterotopic FC (LI\_he) in  
30 language network (LAN). Moreover, OM showed higher neural alignment to YNM (i.e., similar  
31 lateralization pattern) than ONM in LI\_intra in CON, LAN, frontoparietal network (FPN) and  
32 default mode network (DMN) and LI\_he in DMN. These findings suggest that musical training  
33 contributes to the preservation of youth-like lateralization in older adults. Furthermore, stronger  
34 left-lateralized and lower alignment-to-young of LI\_intra in somatomotor network (SMN) and  
35 dorsal attention network (DAN) and LI\_he in DMN correlated with better speech performance  
36 in ONM. In contrast, stronger right-lateralized LI\_intra in FPN and DAN and higher alignment-  
37 to-young of LI\_he in LAN correlated with better performance in OM. Thus, functional  
38 preservation and compensation of lateralization may play different roles in speech perception  
39 in noise for the elderly with and without musical expertise, respectively. Our findings provide  
40 insight into successful aging theories from the unique perspective of functional lateralization  
41 and speech perception.

42

43 **Significance statement**

44 As a positive lifestyle which contributes to neural resource enrichment, musical training  
45 experience may mitigate age-related decline in speech perception in noise through both  
46 functional compensation and preservation. What is unknown is whether older musicians rely  
47 more on one of these mechanisms, and how is it different from older non-musicians. From a  
48 unique perspective of functional lateralization, we found that high-performing older musicians  
49 showed stronger preservation of youth-like lateralization with a more right-lateralized pattern  
50 whereas high-performing older non-musicians were associated with stronger scaffolding of  
51 compensatory networks with a more left-lateralized pattern. Our findings suggest that older  
52 musicians and non-musicians exhibit different coping strategies in terms of functional  
53 lateralization against aging, which would largely enrich aging theories and inspire training  
54 intervention.

55

## 56 **Introduction**

57 The world's population ages at an unprecedented rate, posing a serious burden on families and  
58 society. Neurocognitive aging is characterized by multidimensional cognitive decline and  
59 prominent changes in brain structure and function (1–3). One of the salient problems for older  
60 adults in everyday life is difficulty understanding speech in “cocktail party” scenarios, even if  
61 their hearing is normal for their age. Both the hemispheric asymmetry reduction in older adults  
62 (HAROLD) model and the scaffolding theory of aging and cognition (STAC) posit that our brain  
63 could adapt through compensatory mechanisms to offset the adverse effects of aging, including  
64 increased fronto-parietal and bilateral recruitment with decreased brain lateralization (1, 4).  
65 Meanwhile, based on the revised STAC model (5), life-course factors such as musical training  
66 can enhance both the functional preservation and compensatory scaffolding processes to  
67 ameliorate the aging effects. Indeed, empirical studies have demonstrated the benefits of long-  
68 term or short-term musical training on speech perception in noisy environments for older adults  
69 (6–10), although such benefits have not been robustly observed in young and middle-aged  
70 adults (11, 12). However, it remains unclear whether and how functional preservation and  
71 compensation differentially support speech in noise perception in older adults with or without  
72 lifetime musical training experience. The answer to this question could help us develop effective  
73 and individualized interventions to promote listening skills and healthy aging in the elderly.

74 On the one hand, older adults may engage in functional compensation to improve speech  
75 perception in noisy environments. This compensation is achieved through elevated activities in  
76 the cingulo-opercular network (CON, also called salience network) and frontoparietal network  
77 (FPN), supporting a compensatory scaffolding for attention, working memory and cognitive  
78 control (13–16). Additionally, old adults also up-regulate task activity and preserve the  
79 specificity of phoneme representations in sensorimotor regions to compensate for speech  
80 perception in noise (17). These functional compensations result in a reduction of the asymmetry  
81 of activation patterns associated with aging, as proposed by the HAROLD model (3, 4), and  
82 are supported by behavioral (18), positron emission tomography (PET) (19),  
83 electroencephalography (20), near-infrared spectroscopy (21), as well as task and resting-state  
84 functional magnetic resonance imaging (fMRI) studies (22, 23). These findings support the

85 compensation theory, which proposes that brain networks become more bilateral to  
86 compensate for age-related neural declines.

87 Older musicians may also employ functional compensation to mitigate the aging effect on  
88 speech perception. Compared to non-musicians, musicians exhibit enhanced auditory-motor  
89 integration during speech perception in noise, manifested by increased right lateralization of  
90 the dorsal stream's key fiber (24), stronger activation of the right auditory cortex, and  
91 heightened functional connectivity between the right auditory and bilateral motor regions (25).  
92 Actually, greater musical training-related plasticity were reported in the right hemisphere at both  
93 the structural and functional levels (26). A recent study has shown the increased recruitment of  
94 frontal-parietal regions and greater deactivation of the default mode network (DMN) region as  
95 two means of functional compensation for speech in noise perception in older musicians  
96 (10)(Zhang et al., 2023).

97 On the other hand, musical training has been suggested as a “cognitive reserve” that can  
98 delay age-related cognitive declines (6, 7). Compared to older non-musicians, older musicians  
99 show enhanced central auditory processing functions and preserved cognitive abilities  
100 including auditory attention and working memory, which may support their comparable  
101 performance to young adults (8, 9, 27, 28). Moreover, musical expertise in young adults has  
102 been found to retain right-lateralized ventral attention and improve the neural specificity of  
103 speech representations in auditory as well as speech motor regions (25, 29), whereas  
104 maintained youth-like neural specificity of speech representations in sensorimotor areas in  
105 older musicians has been revealed as a key mechanism to achieve successful speech in noise  
106 perception (10). Therefore, the benefit of musical expertise on older adults’ speech perception  
107 in noisy environments is likely associated with functional preservation as well.

108 In this resting-state fMRI study, we aimed to reveal the specific brain mechanism that older  
109 musicians (OM) and older non-musicians (ONM) use to counteract age-related decline, by  
110 uncovering how aging and life-long musical training experience affect intrinsic functional  
111 lateralization and its relationship with speech in noise perception ability. We adopted functional  
112 lateralization based on spontaneous brain activity at resting state, as it reflects a fundamental  
113 organization characteristic of the intrinsic functional architecture of the brain and changes with  
114 aging and musical experience (23, 30, 31). Previous studies have shown that the degree of

115 functional lateralization of resting-state functional connectivity (rs-FC) predicts individuals'  
116 language and visuospatial abilities, providing evidence that functional lateralization of rs-FC is  
117 associated with human cognition (32–34). Here, we defined two types of lateralization indices  
118 (LIs) based on rs-FC and compared them between older groups and young non-musicians  
119 (YNM): LI of intrahemispheric FC (LI\_intra) which represents the left-right connectivity strength  
120 difference within the same hemisphere, and LI of interhemispheric heterotopic FC (LI\_he) which  
121 represents the left-right connectivity strength difference across the bilateral hemispheres (30,  
122 33–35). Larger positive values of LI\_intra and LI\_he indicate stronger within-hemisphere  
123 interactions and across-hemisphere interactions in the left hemisphere, respectively, whereas  
124 larger negative values imply stronger interactions in the right hemisphere. To further figure out  
125 the functional lateralization of which network shows functional compensation and which one  
126 produces functional preservation in the aging process with and without musical expertise, we  
127 performed correlations between speech in noise perception threshold and network-based LI as  
128 well as its neural alignment-to-young, which was defined by inter-subject spatial pattern  
129 similarity between LI of each older subject and group average of LI in YNM across the same  
130 network vertices (see **Fig. 1**). We hypothesized that ONM and OM would adopt different coping  
131 strategies against aging, by showing different functional lateralization patterns and relationships  
132 between network-based LI and/or its neural alignment and speech perception thresholds.  
133 Specifically, ONM may exhibit functional compensation, that is, the less similar the lateralization  
134 was to YNM, the better performance. And OM were more likely to reflect functional preservation,  
135 that is, the more similar the lateralization was to YNM, the better performance.

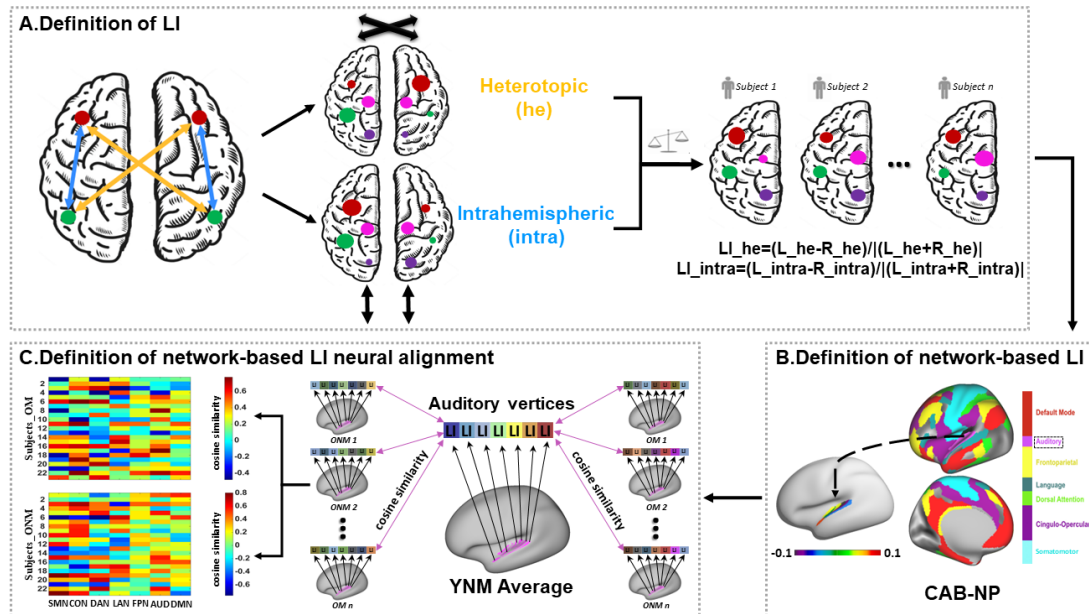

136  
137 **Fig. 1. Workflow of analyses.** (A) Definition of LI. We first defined two different types of  
138 functional connectivity (FC) among the whole brain, named interhemispheric heterotopic FC  
139 (yellow) and intrahemispheric FC (blue). For a specific surface vertex, the heterotopic (he) was  
140 defined as the sum of heterotopic FCs between this vertex and all the others in the opposite  
141 hemisphere except the homotopic one, whereas the intrahemispheric (intra) was defined as the  
142 sum of intrahemispheric FCs between this vertex and all the others within the same hemisphere.  
143 Then, the functional lateralization between each homotopic pair of surface vertices was  
144 quantified by a commonly used laterality index (LI):  $LI = (L-R)/(L+R)$ . Therefore, every subject  
145 would have two LI maps of he and intra. Larger positive values of  $LI_{he}$  and  $LI_{intra}$  imply  
146 stronger across-hemisphere interactions or within-hemisphere interactions in left-hemispheric  
147 vertices, respectively, whereas larger negative values indicate stronger interactions in right-  
148 hemispheric vertices. (B) Definition of network-based LI. Based on Cole-Anticevic Brain-wide  
149 Network Partition version 1.0 (CAB-NP v1.0), we acquired LIs of homotopic vertices belonging  
150 to seven task-relevant networks including somatomotor (SMN), cingulo-opercular (CON),  
151 dorsal attention (DAN), language (LAN), frontoparietal (FPN), auditory (AUD), and default-  
152 mode (DMN). (C) Definition of network-based LI neural alignment. Taken the AUD for example,  
153 we calculated cosine similarity between the group average of LI in young non-musicians (YNM)  
154 and LI in every older subject across all AUD vertices. By doing this, two cosine similarity  
155 matrices for seven networks of older non-musicians (ONM) and older musicians (OM) were  
156 obtained. Using the same approach, we also obtained the cosine similarity matrix of YNM.

## 157 Results

### 158 Musical expertise counteracts age-related decline of speech perception in noisy 159 environments

160 Twenty-four YNM, 23 OM, and 23 ONM completed the experiment. The two older groups  
161 exhibited no significant differences in age, hearing level and Montreal Cognitive Assessment

162 (MoCA), but significant difference in education ( $t_{44} = 3.769$ , Cohen's  $d = 1.112$ ,  $p < 0.001$ ).  
 163 Among three groups, separate one-way analysis of variance (ANOVA) showed a significant  
 164 main effect of group on speech perception threshold with noise masking (speech-in-noise (SIN):  
 165 Welch  $F(2, 38.091) = 25.070$ ,  $\eta^2 = 0.526$ ,  $p < 0.001$ ), speech perception threshold with speech  
 166 masking (speech-in-speech (SIS): Welch  $F(2, 38.920) = 28.217$ ,  $\eta^2 = 0.568$ ,  $p < 0.001$ ), and  
 167 auditory digit span ( $F(2, 67) = 28.749$ ,  $\eta^2 = 0.462$ ,  $p < 0.001$ ). Post-hoc analysis revealed that  
 168 ONM showed significantly worse performance on each task than OM and YNM [all false  
 169 discovery rate (FDR)- or Games-Howell-corrected  $p < 0.001$ ], but no significant difference was  
 170 found between OM and YNM, suggesting that musical expertise offset older adults' decline of  
 171 speech perception in noisy environments. For more details, see **Table 1**.

172

173 **Table 1. The group mean  $\pm$  standard deviation values and statistics of demographic and**  
 174 **behavioral data in each group.**

|                                  | YNM              | OM               | ONM              | $t/\chi^2$ /Welch $F/F$ ( $p$ ) |
|----------------------------------|------------------|------------------|------------------|---------------------------------|
| Age (year)                       | 23.13 $\pm$ 2.38 | 64.61 $\pm$ 3.76 | 66.70 $\pm$ 3.34 | 1.207 <sup>a</sup> (0.053)      |
| Sex (F/M)                        | 12/12            | 9/14             | 14/9             | 2.174 <sup>b</sup> (0.337)      |
| Education (year)                 | 16.50 $\pm$ 1.67 | 13.15 $\pm$ 3.06 | 9.89 $\pm$ 2.80  | -3.769 <sup>a</sup> (<0.001)    |
| MoCA (score)                     | NA               | 27.91 $\pm$ 1.24 | 27.65 $\pm$ 1.37 | -0.677 <sup>a</sup> (0.502)     |
| Hearing Level (dB HL)            | 0.71 $\pm$ 3.32  | 12.33 $\pm$ 5.42 | 12.57 $\pm$ 4.01 | 0.170 <sup>a</sup> (0.866)      |
| Speech-in-Noise Perception (dB)  | -3.99 $\pm$ 0.59 | -3.61 $\pm$ 0.97 | -1.04 $\pm$ 1.90 | 25.070 <sup>c</sup> (<0.001)    |
| Speech-in-Speech Perception (dB) | -5.43 $\pm$ 1.00 | -4.97 $\pm$ 1.51 | -0.31 $\pm$ 3.09 | 28.217 <sup>c</sup> (<0.001)    |
| Digit Span (number)              | 16.71 $\pm$ 2.71 | 15.09 $\pm$ 2.27 | 11.57 $\pm$ 2.06 | 28.749 <sup>d</sup> (<0.001)    |
| Stroop (second)                  | 0.18 $\pm$ 0.12  | 0.18 $\pm$ 0.10  | 0.23 $\pm$ 0.19  | 0.974 <sup>d</sup> (0.383)      |
| Age of Training Onset (age)      | NA               | 11.17 $\pm$ 4.66 | NA               |                                 |
| Years of Training (year)         | NA               | 49.84 $\pm$ 8.26 | NA               |                                 |

175 YNM, young non-musicians; ONM, older non-musicians; OM, older musicians.

176 MoCA, Montreal Cognitive Assessment; NA, data were not collected.



177 One-way analysis of variances, independent two-sample t-tests and Chi-square test were  
178 used for examining the group differences.

179 <sup>a</sup> Independent two-sample t-test (for age, education, MoCA and hearing level between ONM  
180 and OM).

181 <sup>b</sup> Chi-square test.

182 <sup>c</sup> One-way analysis of variance with *Welch F* value.

183 <sup>d</sup> One-way analysis of variance with *F* value.

184

### 185 **Musical expertise offsets age-related hemispheric lateralization reduction**

186 To reveal how aging and musical expertise influence brain functional lateralization, we  
187 examined the difference in LIs between YNM, ONM, and OM. We first calculated global LI maps  
188 of LI\_intra and LI\_he at the vertex level for each group, and found that YNM presented left-  
189 lateralized LI\_intra in language related areas and DMN areas and right-lateralized LI\_intra in  
190 CON areas (**Fig. 2A**), which were similar to previously reported patterns (33, 34). However,  
191 results of LI\_he in three groups have not been reported in previous studies. Generally speaking,  
192 ONM showed more symmetrical FC pattern and substantially diminished lateralization pattern  
193 compared to YNM, while OM preserved more similar lateralization pattern to YNM. These  
194 differences in global lateralization pattern were further verified by the correlations between  
195 group-averaged LIs in YNM and those in two older groups across all vertices (**Fig. 2B**), with  
196 OM and YNM having higher *r* values than ONM and YNM (LI\_intra:  $z = 15.608$ ,  $p < 0.001$ ; LI\_he:  
197  $z = 10.606$ ,  $p < 0.001$ ).

198 To confirm our findings at the network level, we calculated network-based LI by averaging  
199 the LIs belong to the same network defined by Cole-Anticevic Brain-wide Network Partition  
200 version 1.0 (CAB-NP v1.0) (36). We selected seven networks that are relevant to speech in  
201 noise tasks (37) and modulated by aging and musical training (38), including somatomotor  
202 network (SMN), dorsal attention network (DAN), language network (LAN), auditory network  
203 (AUD), CON, FPN and DMN. We then defined network-based LIs based on global LI maps.  
204 One-way ANOVAs revealed a significant group difference on LI\_intra of CON ( $F(2, 67) = 4.706$ ,  
205  $\eta^2 = 0.123$ ,  $p = 0.012$ ) and LI\_he of LAN (Welch  $F(2, 38.241) = 3.313$ ,  $\eta^2 = 0.093$ ,  $p = 0.047$ ).  
206 Post hoc tests demonstrated that ONM showed a significantly larger LI (close to zero) than  
207 YNM (LI\_intra of CON: FDR-corrected  $p = 0.021$ ; LI\_he of LAN: Games-Howell-corrected  $p =$   
208  $0.044$ ) but no difference was discovered between OM and two non-musician groups (**Fig. 3**).

209 Further one-sample t-tests found a significantly right-lateralized LI\_intra of CON in YNM and  
210 OM (both  $t < -4.099$ , FDR-corrected  $p < 0.001$ ) but not in ONM, and a significantly right-  
211 lateralized LI\_he of LAN in all three groups (all  $t < -2.772$ , FDR-corrected  $p < 0.05$ ). These  
212 results supported the HAROLD model and suggested that aging was associated with reduced  
213 hemispheric asymmetry especially in CON and LAN via functional compensation, while musical  
214 expertise counteracted such changes in lateralization via functional preservation, making OM  
215 more alike YNM.  
216

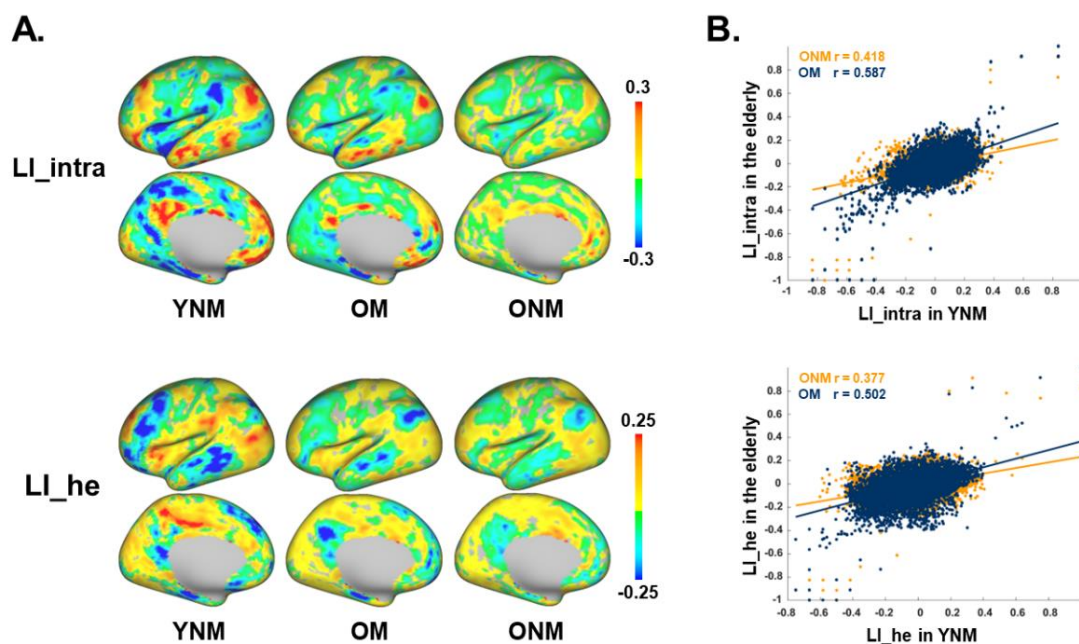

217  
218 **Fig. 2. Vertex-based LI in three groups.** (A) Group averaged global maps of vertex-based  
219 LI\_intra and LI\_he in YNM, OM, and ONM. (B) Correlations between group-averaged LIs in  
220 YNM and in two older groups across vertices, with OM showing significantly higher correlation  
221 than ONM (OM, blue; ONM, yellow).

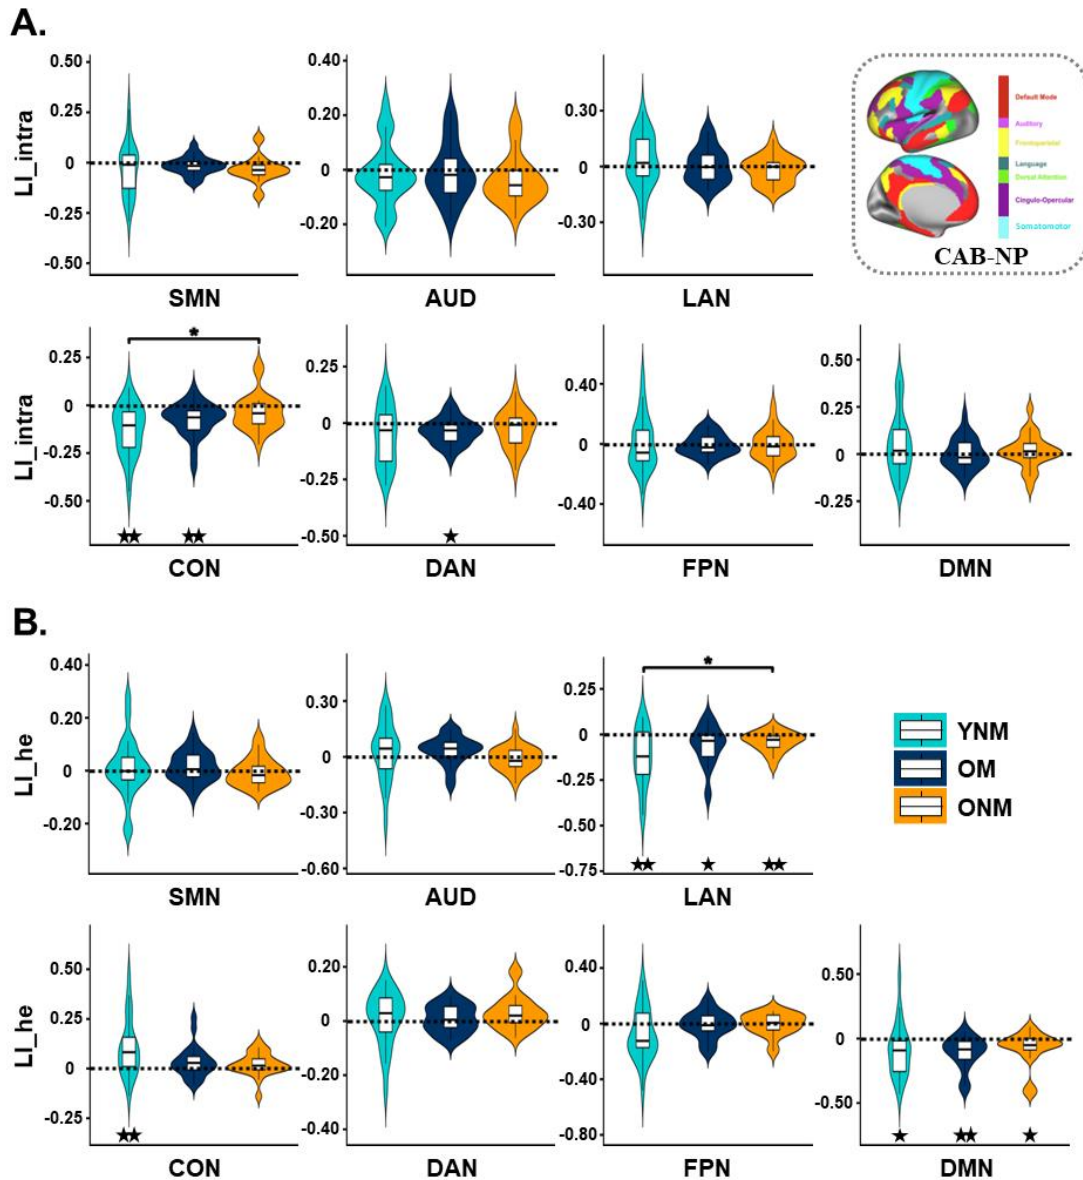

222

223 **Fig. 3. Group comparisons of network-based LI.** LI<sub>intra</sub> (A) and LI<sub>he</sub> (B) were compared  
 224 among YNM, OM and ONM in each of the seven networks. \* FDR-corrected or Games-Howell-  
 225 corrected  $p < 0.05$  by post hoc tests after one-way analysis of variances. \* FDR-corrected  $p <$   
 226  $0.05$ , \*\*FDR-corrected  $p < 0.01$  by one-sample t-tests. All dashed lines indicate zero (no  
 227 functional lateralization).

228

### 229 Musical expertise rejuvenates older adults' lateralization pattern

230 As shown above, OM had more similar lateralization pattern as YNM. To directly verify this  
 231 phenomenon, we adopted the neural alignment-to-young measure of network-based LI by  
 232 calculating the cosine similarity between LI<sub>intra</sub>/LI<sub>he</sub> in every subject and the group average  
 233 of LI<sub>intra</sub>/LI<sub>he</sub> in YNM across the vertices belonging to the same network (Fig. 1C). Lower  
 234 neural alignment represents less similar functional lateralization pattern to YNM. One-way

235 ANOVAs on neural alignment of LI\_intra (**Fig. 4A**) demonstrated significant group differences  
236 in several networks including LAN, CON, FPN and DMN (all *F*/*Welch F* > 5.082,  $\eta^2 > 0.135$ , *p*  
237 < 0.010). Post hoc tests revealed that ONM showed significantly lower alignment-to-young than  
238 YNM in all four networks (all FDR- or Games-Howell-corrected *p* < 0.01), but no significant  
239 difference was found between OM and YNM. In parallel, significant group differences were  
240 found on neural alignment of LI\_he in SMN, CON, DAN, FPN and DMN (all *F* > 4.912,  $\eta^2 >$   
241 0.128, *p* < 0.010, **Fig. 4B**). Post hoc tests showed significantly lower alignment in both ONM  
242 and OM than in YNM in SMN, CON, DAN and FPN (all FDR-corrected *p* < 0.05). For DMN, a  
243 significant difference was found only between YNM and ONM (FDR-corrected *p* = 0.014), but  
244 not between YNM and OM. Together, we confirmed that OM preserved youth-like lateralization  
245 pattern in networks including LAN, CON, FPN and DMN.

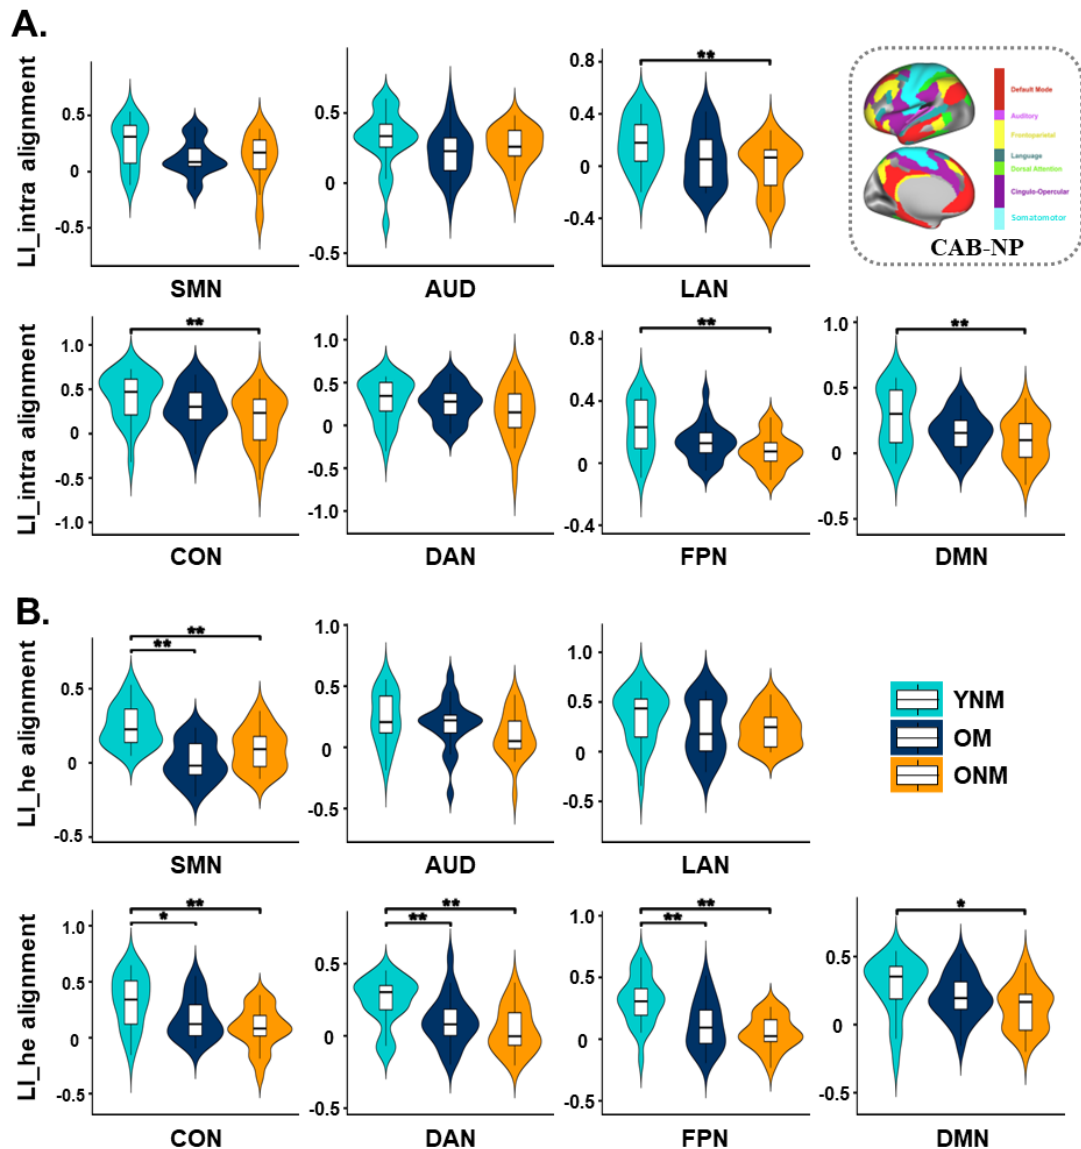

246

247 **Fig. 4. Group comparisons of neural alignment-to-young of network-based LI.** Neural  
 248 alignment-to-young of LI\_intra (A) and LI\_he (B) were compared among YNM, OM and ONM  
 249 in each of the seven networks. \* FDR-corrected  $p < 0.05$ , \*\* FDR-corrected or Games-Howell-  
 250 corrected  $p < 0.01$  by post hoc tests after one-way analysis of variances.

251

252 **Lateralization differentially contributes to speech perception in noisy environments in**  
 253 **older musicians and older non-musicians**

254 Since OM and ONM presented different lateralization patterns relative to YNM, we then asked  
 255 whether and how functional lateralization was related to speech in noise perception  
 256 performance in two older groups, of which brain network exhibiting functional compensation  
 257 and which one producing functional preservation. Notably, hearing level, working memory and  
 258 inhibitory control were related to speech perception in noise, and significant group differences

259 were found in education, mean framewise displacement (mFD) ( $t_{44} = -2.147$ , Cohen's  $d = -0.633$ ,  
260  $p < 0.05$ ). We thus regressed out sex, education, hearing level, digit span, stroop score, MoCA,  
261 mFD and mean global FC ( $t_{44} = -1.055$ ,  $p = 0.297$ ), and conducted partial correlations of  
262 network-based LI and its neural alignment with speech perception threshold in two older groups,  
263 respectively.

264 As shown in **Fig. 5A**, lower SIN or SIS threshold (representing better performance) was  
265 correlated with more left-lateralized LI\_intra in SMN (SIN:  $r = -0.620$ , FDR-corrected  $p = 0.049$ )  
266 and DAN (SIN:  $r = -0.618$ , FDR-corrected  $p = 0.049$ ; SIS:  $r = -0.517$ , uncorrected  $p = 0.048$ ),  
267 and more left-lateralized LI\_he in DMN (SIN:  $r = -0.554$ , uncorrected  $p = 0.032$ ) in ONM. In  
268 contrast, in OM lower SIS threshold was correlated with more right-lateralized LI\_intra in FPN  
269 ( $r = 0.690$ , FDR-corrected  $p = 0.031$ ) and DAN ( $r = 0.617$ , uncorrected  $p = 0.014$ , FDR-corrected  
270  $p = 0.050$ ). Therefore, the two older groups displayed quite opposite relationships between  
271 functional lateralization and speech perception threshold.

272 Furthermore, we investigated whether preserved speech in noise perception ability in older  
273 adults with or without lifetime musical experience was linked to a lateralization pattern similar  
274 to that of young adults or the opposite. By means of partial correlations between network-based  
275 LI neural alignment and speech perception threshold, in ONM lower neural alignment of LI\_intra  
276 in SMN ( $r = 0.681$ , FDR-corrected  $p = 0.036$ ) and DAN ( $r = 0.594$ , uncorrected  $P = 0.019$ ) and  
277 lower alignment of LI\_he in DMN ( $r = 0.633$ , uncorrected  $p = 0.011$ ) were correlated with lower  
278 SIN threshold (**Fig. 5B**), that is, the less similar the lateralization was to YNM, the better  
279 performance, suggesting that functional compensation of lateralization may play an important  
280 role in speech perception in noisy conditions for older non-musicians. However, in OM higher  
281 alignment of LI\_he in LAN ( $r = -0.573$ , uncorrected  $p = 0.026$ ) was correlated with lower SIS  
282 threshold (**Fig. 5B**), that is, the more similar the lateralization was to YNM, the better  
283 performance, indicating an exactly opposite pattern of functional preservation of lateralization  
284 in speech perception in noisy conditions for older musicians.

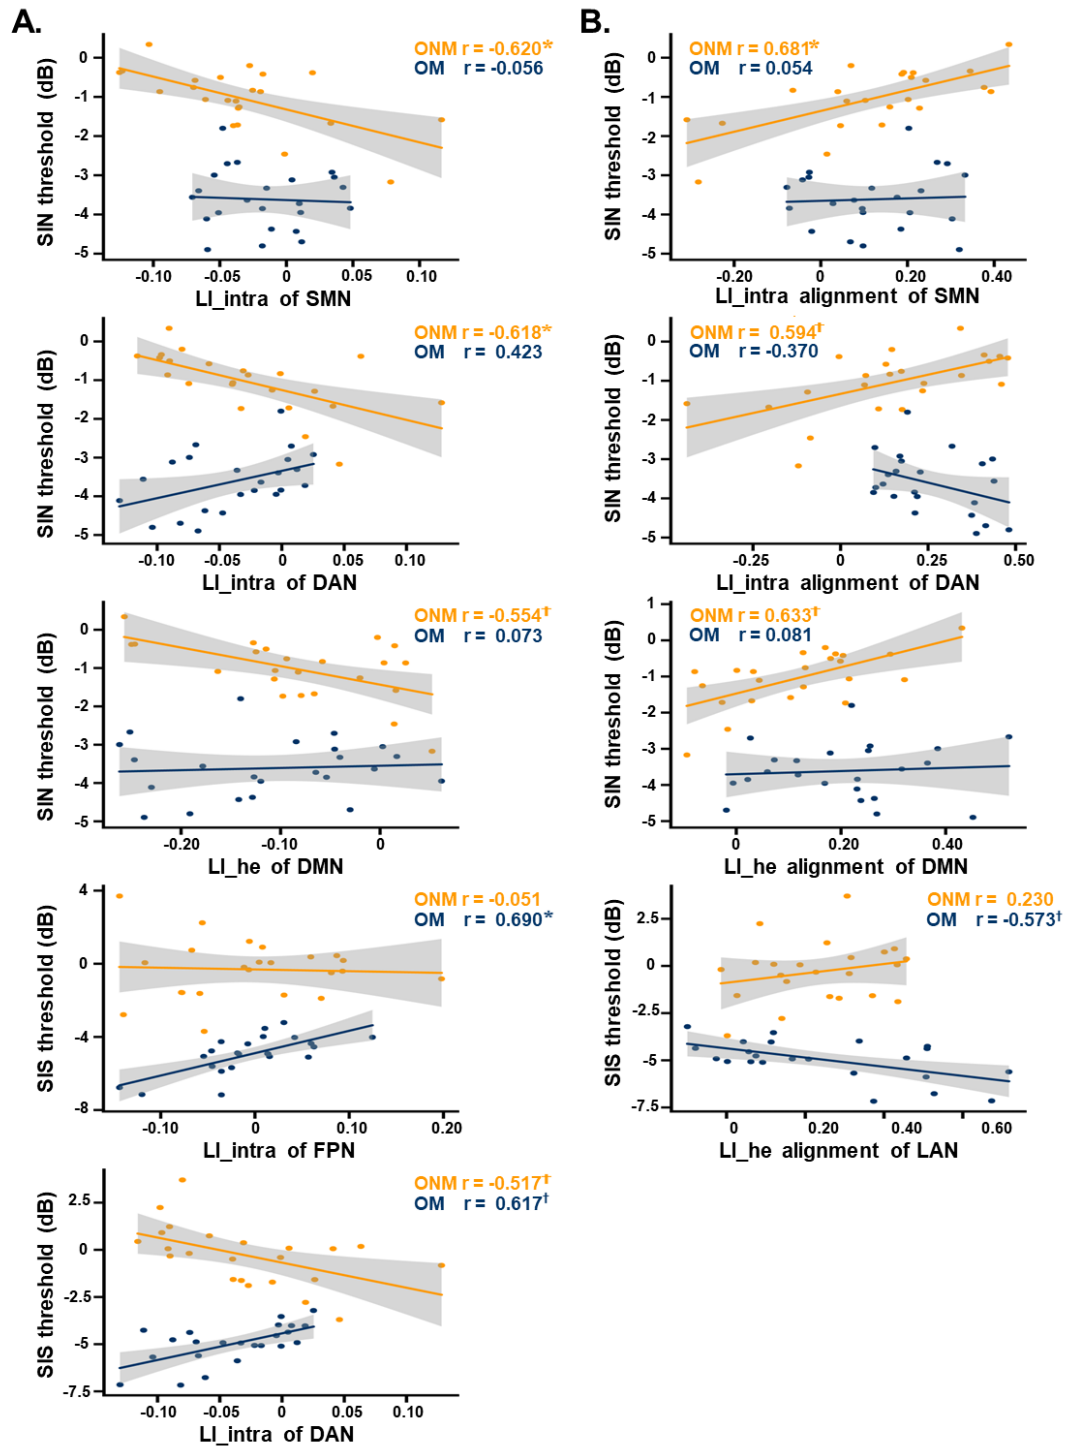

285

286 **Fig. 5. Correlations of network-based LI and its neural alignment with behaviors. (A)**

287 Partial correlations between network-based LI and speech-in-noise (SIN) threshold or speech-

288 in-speech (SIS) threshold in OM and ONM, after controlling for sex, education, hearing level,

289 digit span, stroop, MoCA, mean framewise displacement and mean global functional

290 connectivity. **(B)** Similar partial correlations between network-based LI alignment and SIN or

291 SIS threshold. \* FDR-corrected  $p < 0.05$ ,  $^\dagger$  uncorrected  $p < 0.05$ .

292

293 **Discussion**

294 From a previously untouched perspective of intrinsic brain functional lateralization, we provide  
295 evidence that long-term musical training counteracts age-related decline of speech in noise  
296 perception via preservation of youth-like functional lateralization, whereas older adults without  
297 musical training experience rely on stronger scaffolding of compensatory hemisphere with less  
298 similar functional lateralization pattern as young adults to maintain speech perception  
299 performance. In parallel with behavioral findings that age-related decline in perceiving speech  
300 sentences under “cocktail party” scenarios (with either speech or noise masker) was found only  
301 in ONM but not in OM, YNM’s strong right lateralization of intrahemispheric FC in CON and  
302 interhemispheric heterotopic FC in LAN were significantly decreased to a bilaterally symmetric  
303 pattern in ONM but not in OM. In addition, ONM were less similar to the YNM template than  
304 YNM in the functional lateralization of most networks, while OM preserved youth-like  
305 lateralization pattern in networks including LAN, CON, FPN and DMN. Moreover, functional  
306 lateralization contributed to speech in noise perception quite differently in OM and ONM: in  
307 ONM, the more left-lateralized pattern and the lower neural alignment-to-young (i.e., less similar  
308 lateralization pattern to YNM), the better performance, suggesting a functional compensation  
309 mechanism; whereas in OM, the more right-lateralized pattern and the higher neural alignment-  
310 to-young (i.e., more similar lateralization pattern to YNM), the better performance, suggesting  
311 a functional preservation mechanism. Therefore, successful aging in speech perception can be  
312 achieved by opposite functional lateralization changes in older adults with and without musical  
313 training.

314 **Functional compensation in older non-musicians.** It is generally accepted that our brain  
315 responds to age-related anatomical and physiological changes by reorganizing its function (4).  
316 Compared with young adults, older adults showed a more bilateral pattern of prefrontal activity  
317 during verbal recall, which motivated the HAROLD model interpreting this functional  
318 lateralization change as reflecting functional compensation (4). Resting-state fMRI studies also  
319 reported lateralization decrease with aging in several networks, such as sensorimotor,  
320 attentional, and frontal networks (23, 39). All these findings convergently support the notion that  
321 the increased bilateral recruitment and lateralization decrease serve as a compensatory



322 scaffolding for age-related neural decline (1).

323       Here, we found that LI\_intra in CON and LI\_he in LAN significantly changed from right-  
324 lateralization in YNM to bilateralization in ONM, which corresponded to previous studies and  
325 further clarified the specific need for additional neural resources for attentional control via left  
326 within-hemisphere interactions and language processing via left-to-right across-hemisphere  
327 interactions by older non-musicians. However, these LI changes for functional compensation  
328 did not directly influence speech in noise perception in ONM. Instead, ONM performed better  
329 with a less similar functional lateralization pattern to YNM presenting more left-lateralized in  
330 SMN, DAN, and DMN. Previous task fMRI studies have demonstrated the compensatory role  
331 of left speech motor areas (17) and bilateral sensorimotor regions (10) for poor speech  
332 encoding under adverse listening conditions in ONM. From the perspective of functional  
333 lateralization of resting-state fMRI, our findings that high-performing older adults had a more  
334 bilateral and even left-lateralized SMN which deviated from the pattern of young adults further  
335 supplemented the sensorimotor integration as a compensatory scaffolding for speech  
336 perception in the aging group. In addition, consistent with the posterior-anterior shift in aging  
337 and the decline-compensation hypothesis (40, 41), ONM also recruit more frontal areas to  
338 compensate for declined sensory functions when performing the SIN task (15–17). Since the  
339 ability to track and understand speech amid competing sound sources is supported by higher-  
340 level cognitive processes such as selective attention (42–44), the functional lateralization  
341 pattern of DAN and its relationship with speech in noise perception in high-performing ONM  
342 might represent another compensatory scaffolding for greater listening effort. Besides focusing  
343 attention on external auditory information, subjects need to inhibit task-unrelated long-term  
344 memory supported by DMN to avoid interference, which means that the DMN is required to be  
345 inhibited when perceiving speech in noise. Previous studies have reported older adults' deficits  
346 in cognitive control and resource reallocation to the task-related regions, indicating that failure  
347 to inhibit DMN in the elderly is detrimental to task performance (45, 46). In high-performing  
348 ONM, we detected a less similar functional lateralization pattern to YNM displaying more  
349 bilateral and even leftward LI\_he of DMN, which supported the compensation theory that  
350 higher-order cognitive networks may become more bilateral and even in the opposite  
351 lateralization pattern to compensate for sensory declines. In total, older adults without musical

352 training experience rely on functional compensation of multiple networks controlling  
353 sensorimotor integration, attention and inhibition of long-term memory to maintain speech in  
354 noise perception performance.

355 **Functional preservation in older musicians.** Broad factors (e.g., experience, genetics, and  
356 environment) are important determinants to influence the course of aging and, in turn, the level  
357 of cognitive function (5). Life-course variables, i.e., the accumulation of experiences and states  
358 an individual has experienced from birth to death (47), can impact the structure and function of  
359 the aging brain (5). Long-term musical training experience is one of those variables that have  
360 been found to improve auditory and cognitive functions during adverse listening environments,  
361 especially in the aging population (6, 9). Here, functional lateralization of CON and LAN in YNM  
362 was significantly weakened in ONM but was preserved in OM. Neural alignment analysis further  
363 detected more evident discrepancies between YNM and ONM than between YNM and OM in  
364 LAN, CON, FPN and DMN, demonstrating that musical training experience helps older adults  
365 preserve a youth-like functional lateralization pattern in networks association with language  
366 processing, attentional and cognitive control. These wide spread youthful lateralization patterns  
367 are consistent with previous researches (29, 33), showing that musical training has an age-  
368 decelerating effect on the brain (6, 9, 10). Compared to non-musicians, musicians' predicted  
369 brain age was younger than their chronological age using a machine-learning algorithm (48).

370 Moreover, this functional preservation supported speech in noise perception in OM. A  
371 recent task fMRI study found that OM had better speech-in-noise perception performance  
372 through functional preservation by maintaining similar speech representation patterns as young  
373 adults (10). However, in this resting-state fMRI study, high-performing OM showed more  
374 rightward LI\_intra in DAN and FPN and higher alignment-to-young of LI\_he in LAN, presenting  
375 an exactly opposite relationship to ONM. LI\_intra in DAN was significantly right-lateralized only  
376 in OM, while bilateral organized in YNM and ONM. These findings were consistent with previous  
377 studies revealing a bilateral dorsal attention system (49) and increased recruitment of the right  
378 hemisphere in speech processing in musicians (24, 25). Since speech in noise perception  
379 engages allocation of attentional resources and inhibitory control (50) that help to disentangle  
380 the target signal from the masker (51), enhancement of these higher-level cognitive processes  
381 has been discovered to correlate with improved speech in noise perception in musicians (9, 27,

382 52, 53). Due to the partial overlap between neural circuits dedicated to music and language  
383 (54), long-term musical training may influence language networks continuously and help  
384 preserve the youth-like lateralization pattern of LAN in older musicians. Our study supports this  
385 notion, as we found high-performing OM showed similar lateralization pattern with higher  
386 alignment-to-young of LI<sub>he</sub> in LAN. The youth-like lateralization pattern of DAN, FPN and LAN  
387 might allow older musicians to functionally reserve cognitive abilities including language,  
388 selective attention, and inhibitory control that all contribute to better speech perception  
389 performance.

390 **Limitations.** Since OM eligible and willing to participate in our fMRI study were rare, OM with  
391 different types of musical expertise were combined into one group (e.g., piano, singing, violin,  
392 etc.). However, the musical training type could have different effect on brain lateralization (55,  
393 56). Comparing the effect of different types of lifelong musical training that older adults major  
394 in could further reveal how musical expertise promotes speech-in-noise perception via  
395 functional lateralization. In addition, the significant difference in neural alignment of network-  
396 based LI was only found between ONM and YNM, but not between ONM and OM, although  
397 OM did not differ from YNM in many networks. A larger sample of participants in future research  
398 will help verify the difference between OM and ONM directly.

399 To sum up, from a previously unidentified perspective of resting-state functional  
400 lateralization and its relationship with speech in noise perception, we found that 1) compared  
401 to young adults, older non-musicians show significant hemispheric lateralization reduction while  
402 older musicians keep youthful lateralization pattern; 2) to maintain speech in noise perception  
403 performance, older non-musicians rely on stronger scaffolding of compensatory networks with  
404 a more bilateral and even left-lateralized pattern, whereas older musicians depend on stronger  
405 preservation of youth-like functional lateralization with a more right-lateralized pattern. Thus,  
406 older non-musicians and older musicians form different coping strategies against aging, which  
407 helps deepen the understanding of functional compensation and functional preservation in  
408 aging theories and inspires individualized training intervention.

409

410

## 411 **Materials and Methods**

### 412 **Participants.**

413 Seventy-four healthy native Mandarin speakers with no history of psychiatric or neurological  
414 disorders participated in the experiment, including 24 YNM ( $23.13 \pm 2.38$  years, twelve females),  
415 25 ONM ( $66.64 \pm 3.40$  years, sixteen females) and 25 OM ( $65.12 \pm 4.06$  years, eleven females).  
416 All participants had normal hearing in both ears with average pure-tone threshold  $< 20$  dB  
417 hearing level from 250 to 4,000 Hz. OM started training before 23 years old (mean =  $10.90 \pm$   
418  $4.56$  years old) with at least 32 years of training (mean =  $50.88 \pm 8.75$  years), and practiced  
419 consistently in recent three years (1 to 42 hours per week, mean =  $12.70 \pm 8.99$  hours per  
420 week). Non-musicians reported less than two years of musical training experience, which did  
421 not occur in the year before the experiment. To screen out people with mild cognitive impairment,  
422 all older participants passed the MoCA of the Beijing version ( $\geq 26$  scores) (57). All participants  
423 reported their educational background and signed informed written consent approved by the  
424 ethical committee of the Institute of Psychology, Chinese Academy of Sciences. For more  
425 details on participants, see Zhang et al. (10) which used the same subjects.

426

### 427 **Behavioral Tests.**

428 The speech in noise perception threshold was assessed using the SIN and SIS tasks in which  
429 syntactically correct but semantically meaningless speech sentences (for instance, “一些条令  
430 已经翻译我的大衣” “Some rules had translated my coat”) were embedded in a speech-  
431 spectrum noise (SIN task) or a two-talker speech masker (SIS task) at different signal-to-noise  
432 ratios (SNR =  $-12$ ,  $-8$ ,  $-4$ ,  $0$ , and  $4$  dB). The stimuli were presented binaurally through  
433 Sennheiser HD380 Pro headphones driven by a Dell desktop computer. The interaural time  
434 difference of the target sentence and the masker was manipulated to generate two perceived  
435 spatial relationships between the target and the masker: colocation and separation. Participants  
436 were asked to repeat the whole target sentence as best as they could immediately after the  
437 sentence was completed. A logistic psychometric function was employed in Matlab 2016b to fit  
438 each subject's data for each masking and spatial relationship condition using the Levenberg–  
439 Marquardt method, and the SNR corresponding to 50% correct identification across two spatial

440 relationships was used as the threshold ratio for the SIN and SIS tasks. For more details on  
441 other tests we used, see the corresponding section in Supporting Information.

442

#### 443 **Data Acquisition and Processing.**

444 Imaging data were collected using a 3 T MRI system (Siemens Magnetom Trio) with a 20-  
445 channel head coil. The high-resolution T1-weighted anatomical image was obtained using  
446 magnetization-prepared rapid acquisition with gradient echo (MPRAGE): repetition time (TR) =  
447 2200 ms, echo time (TE) = 3.49 ms, field of view (FOV) = 256 mm, flip angle (FA) = 8°, slice  
448 thickness = 1 mm, voxel size = 1 × 1 × 1 mm, 192 slices. Slowly fluctuating brain activity was  
449 measured using a multiband-accelerated echo-planar imaging (EPI) series with whole-brain  
450 coverage while subjects were instructed to rest still and quietly: TR = 640 ms, TE = 30 ms, FOV  
451 = 192 mm, FA = 25°, slice thickness = 3 mm, voxel size = 3 × 3 × 3 mm, 40 slices, multiband  
452 factor = 4. Each T1-weighted scan lasted 7 min 13 s and each resting-state scan lasted 8 min  
453 6 s for a total of 750 consecutive whole-brain volumes.

454 Preprocessing was performed using fMRIPrep 20.2.5 (58). Functional MRI data were  
455 preprocessed with slice-timing correction, motion correction, distortion correction, co-  
456 registration to structural data, normalization to MNI space, and projection to cortical surface.  
457 Then the eXtensible Connectivity Pipeline (XCP-D) (59) was used to post-process the outputs  
458 of fMRIPrep, including demeaning, detrending, nuisance regression, band-pass filtering. In  
459 addition, we used FD to identify high movement frames in data (>0.5 mm). By adopting  
460 “scrubbing” for each of these data points (head radius = 50 mm for computing FD, FD threshold  
461 = 0.5 mm for censoring), we excluded two OM with more than 20% data above the high motion  
462 cutoff (FD > 0.5). Moreover, one ONM for lacking complete behavioral data and one ONM who  
463 was left-handed were also excluded. Therefore, seventy right-handed subjects were included  
464 in the subsequent analysis. For more details on data processing, see the corresponding section  
465 in Supporting Information.

466

#### 467 **Definition of LI.**

468 To quantify rs-FC at the surface level, we downsampled the original 32k time series into those  
469 with 10k vertices to accelerate further steps. As typically, the rs-FC between two cortical surface

470 vertices was computed as Pearson correlation ( $r$ ) of two vertex-wise blood-oxygen-level  
471 dependent (BOLD) time series and then converted Fisher's  $r$ -to- $z$  transformation to improve the  
472 normality.

473 Based on the whole-brain FC matrix, we obtained interhemispheric heterotopic FC and  
474 intrahemispheric FC. The former represented the FC between two cortical surface vertices  
475 across different hemispheres, except the homotopic pairs while the latter indicated the FC  
476 between two cortical surface vertices within the same hemisphere. For a specific cortical  
477 surface vertex, the heterotopic ( $he$ ) was defined as the sum of heterotopic FCs between this  
478 vertex and all the others in the opposite hemisphere except the homotopic one, whereas the  
479 intrahemispheric ( $intra$ ) was defined as the sum of intrahemispheric FCs between this vertex  
480 and all the others within the same hemisphere. On these bases, we further defined two different  
481 forms of functional lateralization, calculated as

$$482 \quad LI_{he} = (L_{he} - R_{he}) / (L_{he} + R_{he}).$$

$$483 \quad LI_{intra} = (L_{intra} - R_{intra}) / (L_{intra} + R_{intra}).$$

484 Larger positive values of  $LI_{he}$  and  $LI_{intra}$  imply stronger bilateral across-hemisphere  
485 interactions or ipsilateral within-hemisphere interactions in left-hemispheric vertices, whereas  
486 larger negative values indicate stronger interactions in right-hemispheric vertices. Finally, every  
487 subject had two LI maps of  $LI_{he}$  and  $LI_{intra}$ .

488

#### 489 **Definition of Network-based LI and Its Neural Alignment.**

490 According to the CAB-NP v1.0 (36), all cortical surface vertices were mapped into twelve  
491 networks. To calculate network-based LI, we only chose the homotopic pair of vertices  
492 belonging to the same networks via downsampled CAB-NP v1.0 from 32k to 10k. After  
493 averaging within the same network, seven network-based LIs relevant to our behavior tasks  
494 were acquired, including SMN, AUD, LAN, CON, DAN, FPN, and DMN. We further employed  
495 an inter-subject pattern correlation framework to examine spatial network-based LI similarities  
496 between every subject and the YNM average (10, 60). For each network-based LI in every  
497 subject, we adopted an alignment-to-young measure by directly comparing the LI pattern of  
498 each subject and the mean LI pattern of YNM across the same network, using cosine similarity.  
499 By doing this, three cosine similarity matrices of YNM, ONM, and OM for seven networks were

500 obtained. Higher neural alignment implies more similar functional lateralization pattern to YNM,  
501 whereas lower neural alignment indicates less similar functional lateralization pattern to YNM.  
502 All analyses above were performed on both LI\_he and LI\_intra.

503

#### 504 **Statistical Analysis.**

505 To highlight the differences in LI\_he and LI\_intra between the three groups, we presented the  
506 averaged global maps of LIs in YNM, ONM, and OM, respectively. Next, we performed one-  
507 sample t-tests on seven network-based LIs separately for each group to identify whether this  
508 functional network was lateralized (leftward/rightward) or symmetric. One-way ANOVAs for  
509 network-based LIs and network-based LI neural alignments were adopted to compare the group  
510 differences.

511 Since we intended to explore the relation between functional lateralization and behavior,  
512 partial correlations were used to evaluate the relationship between network-based LIs as well  
513 as their neural alignments and speech in noise tasks in two older groups, considering sex,  
514 education, mFD, mFC (mean of rs-FCs between any two cortical surface vertices in the whole  
515 brain), hearing level, auditory digit span, stroop, and MOCA (older subjects only) as  
516 confounding variables. All the results in our analyses were considered to be significant with the  
517 value below 0.05 after FDR correction or Games-Howell correction (one-way ANOVA with  
518 heterogeneity of variance). The brain maps were projected to surfaces depicted by SurfStat  
519 package ([www.math.mcgill.ca/keith/surfstat](http://www.math.mcgill.ca/keith/surfstat)) and Connectome Workbench software platform  
520 (<http://www.humanconnectome.org/software/connectome-workbench.html>).

521

522

523 **Acknowledgments:**

524 The authors thank Yining Chen and Yiyang Wu for helping with data collection.

525 **Funding:**

526 STI 2030—Major Projects 2021ZD0201500 (YD)

527 National Natural Science Foundation of China 31822024 and 31671172 (YD)

528 Strategic Priority Research Program of Chinese Academy of Sciences XDB32010300

529 (YD)

530 Scientific Foundation of Institute of Psychology, Chinese Academy of Sciences

531 E1CX172005 (XHJ), E2CX3625CX (YD) and E1CX4725CX (XYW)

532 **Data and materials availability:** The data that support the findings of this study are

533 available in <https://osf.io/msz2r/>.

534



535 **Reference**

- 536 1. D. C. Park, P. Reuter-Lorenz, The Adaptive Brain: Aging and Neurocognitive Scaffolding.  
537 *Annu. Rev. Psychol.* **60**, 173–196 (2009).
- 538 2. J. D. Koen, M. D. Rugg, Neural Dedifferentiation in the Aging Brain. *Trends in Cognitive*  
539 *Sciences* **23**, 547–559 (2019).
- 540 3. C. Grady, The cognitive neuroscience of ageing. *Nat Rev Neurosci* **13**, 491–505 (2012).
- 541 4. R. Cabeza, Hemispheric asymmetry reduction in older adults: The HAROLD model.  
542 *Psychology and Aging* **17**, 85–100 (2002).
- 543 5. P. A. Reuter-Lorenz, D. C. Park, How Does it STAC Up? Revisiting the Scaffolding Theory  
544 of Aging and Cognition. *Neuropsychol Rev* **24**, 355–370 (2014).
- 545 6. C. Alain, B. R. Zendel, S. Hutka, G. M. Bidelman, Turning down the noise: The benefit of  
546 musical training on the aging auditory brain. *Hearing Research* **308**, 162–173 (2014).
- 547 7. B. R. Zendel, C. Alain, Musicians experience less age-related decline in central auditory  
548 processing. *Psychology and Aging* **27**, 410–417 (2012).
- 549 8. E. Dubinsky, E. A. Wood, G. Nespoli, F. A. Russo, Short-Term Choir Singing Supports  
550 Speech-in-Noise Perception and Neural Pitch Strength in Older Adults With Age-Related  
551 Hearing Loss. *Front. Neurosci.* **13**, 1153 (2019).
- 552 9. L. Zhang, X. Fu, D. Luo, L. Xing, Y. Du, Musical Experience Offsets Age-Related Decline in  
553 Understanding Speech-in-Noise: Type of Training Does Not Matter, Working Memory Is the  
554 Key. *Ear & Hearing* **42**, 258–270 (2021).
- 555 10. L. Zhang, X. Wang, C. Alain, Y. Du, Successful aging of musicians: Preservation of  
556 sensorimotor regions aids audiovisual speech-in-noise perception. *Sci. Adv.* (2023).
- 557 11. I. Yeend, E. F. Beach, M. Sharma, H. Dillon, The effects of noise exposure and musical  
558 training on suprathreshold auditory processing and speech perception in noise. *Hearing*  
559 *Research* **353**, 224–236 (2017).
- 560 12. D. Boebinger, *et al.*, Musicians and non-musicians are equally adept at perceiving  
561 masked speech. *The Journal of the Acoustical Society of America* **137**, 378–387 (2015).
- 562 13. J. Erb, J. Obleser, Upregulation of cognitive control networks in older adults' speech  
563 comprehension. *Front. Syst. Neurosci.* **7** (2013).
- 564 14. M. Emch, C. C. von Bastian, K. Koch, Neural Correlates of Verbal Working Memory: An  
565 fMRI Meta-Analysis. *Front. Hum. Neurosci.* **13**, 180 (2019).
- 566 15. K. I. Vaden, S. E. Kuchinsky, J. B. Ahlstrom, J. R. Dubno, M. A. Eckert, Cortical Activity  
567 Predicts Which Older Adults Recognize Speech in Noise and When. *Journal of Neuroscience*  
568 **35**, 3929–3937 (2015).
- 569 16. P. C. M. Wong, *et al.*, Aging and cortical mechanisms of speech perception in noise.  
570 *Neuropsychologia* **47**, 693–703 (2009).
- 571 17. Y. Du, B. R. Buchsbaum, C. L. Grady, C. Alain, Increased activity in frontal motor cortex  
572 compensates impaired speech perception in older adults. *Nat Commun* **7**, 12241 (2016).
- 573 18. P. A. Reuter-Lorenz, L. Stanczak, A. C. Miller, Neural recruitment and cognitive aging:  
574 Two hemispheres are better than one, especially as you age. *Psychological Science* **10**, 494–  
575 500 (1999).
- 576 19. R. Cabeza, N. D. Anderson, J. K. Locantore, A. R. McIntosh, Aging Gracefully:  
577 Compensatory Brain Activity in High-Performing Older Adults. *NeuroImage* **17**, 1394–1402

- 578 (2002).
- 579 20. T. J. Bellis, T. Nicol, N. Kraus, Aging affects hemispheric asymmetry in the neural  
580 representation of speech sounds. *Journal of Neuroscience* **20**, 791–797 (2000).
- 581 21. L. D. Müller, *et al.*, Neural correlates of a standardized version of the trail making test in  
582 young and elderly adults: a functional near-infrared spectroscopy study. *Neuropsychologia*  
583 **56**, 271–279 (2014).
- 584 22. K. A. Nielson, S. A. Langenecker, H. Garavan, Differences in the functional neuroanatomy  
585 of inhibitory control across the adult life span. *Psychology and aging* **17**, 56 (2002).
- 586 23. O. Agcaoglu, R. Miller, A. R. Mayer, K. Hugdahl, V. D. Calhoun, Lateralization of resting  
587 state networks and relationship to age and gender. *NeuroImage* **104**, 310–325 (2015).
- 588 24. X. Li, R. J. Zatorre, Y. Du, The Microstructural Plasticity of the Arcuate Fasciculus  
589 Undergirds Improved Speech in Noise Perception in Musicians. *Cerebral Cortex* **31**, 3975–  
590 3985 (2021).
- 591 25. Y. Du, R. J. Zatorre, Musical training sharpens and bonds ears and tongue to hear speech  
592 better. *Proc Natl Acad Sci USA* **114**, 13579–13584 (2017).
- 593 26. S. C. Herholz, R. J. Zatorre, Musical Training as a Framework for Brain Plasticity: Behavior,  
594 Function, and Structure. *Neuron* **76**, 486–502 (2012).
- 595 27. B. R. Zendel, G. L. West, S. Belleville, I. Peretz, Musical training improves the ability to  
596 understand speech-in-noise in older adults. *Neurobiology of Aging* **81**, 102–115 (2019).
- 597 28. A. Parbery-Clark, S. Anderson, E. Hittner, N. Kraus, Musical experience offsets age-related  
598 delays in neural timing. *Neurobiology of aging* **33**, 1483–e1 (2012).
- 599 29. C. Luo, *et al.*, Long-Term Effects of Musical Training and Functional Plasticity in Salience  
600 System. *Neural Plasticity* **2014**, 1–13 (2014).
- 601 30. H. Liu, S. M. Stufflebeam, J. Sepulcre, T. Hedden, R. L. Buckner, Evidence from intrinsic  
602 activity that asymmetry of the human brain is controlled by multiple factors. *Proceedings of*  
603 *the National Academy of Sciences* **106**, 20499–20503 (2009).
- 604 31. S. Leipold, C. Klein, L. Jäncke, Musical Expertise Shapes Functional and Structural Brain  
605 Networks Independent of Absolute Pitch Ability. *J. Neurosci.* **41**, 2496–2511 (2021).
- 606 32. S. J. Gotts, *et al.*, Two distinct forms of functional lateralization in the human brain. *Proc*  
607 *Natl Acad Sci USA* **110**, E3435–E3444 (2013).
- 608 33. M. Joliot, N. Tzourio-Mazoyer, B. Mazoyer, Intra-hemispheric intrinsic connectivity  
609 asymmetry and its relationships with handedness and language Lateralization.  
610 *Neuropsychologia* **93**, 437–447 (2016).
- 611 34. M. Raemaekers, W. Schellekens, N. Petridou, N. F. Ramsey, Knowing left from right:  
612 asymmetric functional connectivity during resting state. *Brain Struct Funct* (2018)  
613 <https://doi.org/10/ggd8j8> (September 25, 2020).
- 614 35. D. G. Gee, *et al.*, Low frequency fluctuations reveal integrated and segregated processing  
615 among the cerebral hemispheres. *NeuroImage* **54**, 517–527 (2011).
- 616 36. J. L. Ji, *et al.*, Mapping the human brain's cortical-subcortical functional network  
617 organization. *NeuroImage* **185**, 35–57 (2019).
- 618 37. C. Alain, Y. Du, L. J. Bernstein, T. Barten, K. Banai, Listening under difficult conditions: An  
619 activation likelihood estimation meta-analysis. *Human brain mapping* **39**, 2695–2709 (2018).
- 620 38. R. Sutcliffe, K. Du, T. Ruffman, Music Making and Neuropsychological Aging: A Review.  
621 *Neuroscience & Biobehavioral Reviews* **113**, 479–491 (2020).

- 622 39. X.-N. Zuo, *et al.*, Growing Together and Growing Apart: Regional and Sex Differences in  
623 the Lifespan Developmental Trajectories of Functional Homotopy. *Journal of Neuroscience*  
624 **30**, 15034–15043 (2010).
- 625 40. R. Cabeza, N. D. Anderson, J. K. Locantore, A. R. McIntosh, Aging gracefully:  
626 Compensatory brain activity in high-performing older adults. *NeuroImage* **17**, 1394–1402  
627 (2002).
- 628 41. S. W. Davis, N. A. Dennis, S. M. Daselaar, M. S. Fleck, R. Cabeza, Qué PASA? the posterior-  
629 anterior shift in aging. *Cerebral Cortex* **18**, 1201–1209 (2008).
- 630 42. J. A. O'Sullivan, *et al.*, Attentional Selection in a Cocktail Party Environment Can Be  
631 Decoded from Single-Trial EEG. *Cerebral Cortex* **25**, 1697–1706 (2015).
- 632 43. D. L. Strait, N. Kraus, Can you hear me now? Musical training shapes functional brain  
633 networks for selective auditory attention and hearing speech in noise. *Frontiers in psychology*  
634 **2**, 113 (2011).
- 635 44. S. Puschmann, S. Baillet, R. J. Zatorre, Musicians at the Cocktail Party: Neural Substrates  
636 of Musical Training During Selective Listening in Multispeaker Situations. *Cerebral Cortex* **29**,  
637 3253–3265 (2019).
- 638 45. J. Persson, C. Lustig, J. K. Nelson, P. A. Reuter-Lorenz, Age differences in deactivation: A  
639 link to cognitive control? *Journal of Cognitive Neuroscience* **19**, 1021–1032 (2007).
- 640 46. F. Sambataro, *et al.*, Age-related alterations in default mode network: Impact on working  
641 memory performance. *Neurobiology of Aging* **31**, 839–852 (2010).
- 642 47. K. U. Mayer, The sociology of the life course and lifespan psychology: Diverging or  
643 converging pathways? *Understanding human development: Dialogues with lifespan*  
644 *psychology*, 463–481 (2003).
- 645 48. L. Rogenmoser, J. Kernbach, G. Schlaug, C. Gaser, Keeping brains young with making  
646 music. *Brain Structure and Function* **223**, 297–305 (2018).
- 647 49. M. D. Fox, M. Corbetta, A. Z. Snyder, J. L. Vincent, M. E. Raichle, Spontaneous neuronal  
648 activity distinguishes human dorsal and ventral attention systems. *Proc. Natl. Acad. Sci. U.S.A.*  
649 **103**, 10046–10051 (2006).
- 650 50. S. L. Mattys, J. Brooks, M. Cooke, Recognizing speech under a processing load:  
651 Dissociating energetic from informational factors. *Cognitive psychology* **59**, 203–243 (2009).
- 652 51. R. L. Freyman, U. Balakrishnan, K. S. Helfer, Effect of number of masking talkers and  
653 auditory priming on informational masking in speech recognition. *The Journal of the*  
654 *Acoustical Society of America* **115**, 2246–2256 (2004).
- 655 52. K. J. Pallesen, *et al.*, Cognitive Control in Auditory Working Memory Is Enhanced in  
656 Musicians. *PLoS ONE* **5**, e111120 (2010).
- 657 53. J. Slater, A. Azem, T. Nicol, B. Swedenborg, N. Kraus, Variations on the theme of musical  
658 expertise: cognitive and sensory processing in percussionists, vocalists and non-musicians.  
659 *Eur J Neurosci* **45**, 952–963 (2017).
- 660 54. I. Peretz, D. Vuvan, M.-É. Lagrois, J. L. Armony, Neural overlap in processing music and  
661 speech. *Philosophical Transactions of the Royal Society B: Biological Sciences* **370**, 20140090  
662 (2015).
- 663 55. K. Amunts, *et al.*, Motor cortex and hand motor skills: structural compliance in the human  
664 brain. *Human brain mapping* **5**, 206–215 (1997).
- 665 56. M. Bangert, G. Schlaug, Specialization of the specialized in features of external human

- 666 brain morphology. *European Journal of Neuroscience* **24**, 1832–1834 (2006).
- 667 57. J. Yu, J. Li, X. Huang, The Beijing version of the Montreal Cognitive Assessment as a brief  
668 screening tool for mild cognitive impairment: a community-based study. *BMC psychiatry* **12**,  
669 1–8 (2012).
- 670 58. O. Esteban, *et al.*, fMRIPrep: a robust preprocessing pipeline for functional MRI. *Nature*  
671 *methods* **16**, 111–116 (2019).
- 672 59. R. Ciric, *et al.*, Mitigating head motion artifact in functional connectivity MRI. *Nature*  
673 *protocols* **13**, 2801–2826 (2018).
- 674 60. M. Meshulam, *et al.*, Neural alignment predicts learning outcomes in students taking an  
675 introduction to computer science course. *Nat Commun* **12**, 1922 (2021).
- 676
